# Supplementary material for: Myocarditis Induced by Immunotherapy in Metastatic Melanoma—Review of Literature and Current Guidelines
Source: MDPI journal article supplement (doi:10.3390/jcm11175182), 2022-09-01
Supplement: s1 [file s1]

Table S1. Description of cases of cardiac complications of immunotherapy.

| Authors, Year                         | Number of patients, their mean age and gender and type of cancer | Drug and dosage                                                                                                        | Signs and symptoms                                                                                                                                           | Outcome                                           |
|---------------------------------------|------------------------------------------------------------------|------------------------------------------------------------------------------------------------------------------------|--------------------------------------------------------------------------------------------------------------------------------------------------------------|---------------------------------------------------|
| Heinzerling et al. (2016) [1]         | 8M (67.1), 8 melanoma                                            | 6 ipilimumab (3mg/kg) (1 with nivolumab 1mg/kg; followed by 3mg/kg) , 1 ipilimumab (10mg/kg), 1 pembrolizumab (2mg/kg) | edema, ascites, pleural effusion, dyspnea, decrease of EF                                                                                                    | 3 deaths, 5 resolved (2 permanent decrease of EF) |
| Johnson et al. (2016) [2]             | 1M (63), 1 W (65), melanoma                                      | Nivolumab (1mg) and ipilimumab (3mg/kg)                                                                                | atypical chest pain, dyspnea, and fatigue, profound ST-segment depression, a new intraventricular conduction delay                                           | 2 deaths                                          |
| Saibil et al. (2019) [3]              | 1M (67), melanoma                                                | Nivolumab (1mg) and ipilimumab (3mg/kg)                                                                                | fatigue, weakness, and dyspnea, bradycardia and 3rd-degree heart block                                                                                       | death                                             |
| Yamaguchi et al. (2018) [4]           | 1M (60), melanoma                                                | Nivolumab (2mg/kg) and ipilimumab (ND)                                                                                 | fatigue and fever without chest pain or dyspnea, ST-segment elevation, decrease of EF (from 70% to 15%)                                                      | resolved                                          |
| Geisler et al. (2015) [5]             | 1W (83), melanoma                                                | Ipilimumab (3mg/kg)                                                                                                    | pruritus, lethargy, and malaise, diarrhoea, progressive dyspnoea, chest pain, akinetic apex, hyperkinetic base and septum (takotsubo-like syndrome), EF=50%, | resolved                                          |
| Yun et al. [6]                        | 1M (59), melanoma                                                | Ipilimumab (3mg/kg)                                                                                                    | acute onset chest pain and dyspnoea, 5cm of jugular venous distension, low QRS complex voltage, eicardial thickening and moderate sized pericardial effusion | resolved                                          |
| Läubli and Balmelli et al. (2015) [7] | 1W (73), melanoma                                                | Pembrolizumab (2mg/kg)                                                                                                 | Dyspnoea, congested jugular veins, bilateral rales and lower leg edema, ventricular bigamy, EF=30%                                                           | resolved                                          |

1. Heinzerling, L., et al., *Cardiotoxicity associated with CTLA4 and PD1 blocking immunotherapy*. 2016. **4**(1): p. 50.
2. Johnson, D.B., et al., *Fulminant Myocarditis with Combination Immune Checkpoint Blockade*. N Engl J Med, 2016. **375**(18): p. 1749-1755.
3. Saibil, S.D., et al., *Fatal myocarditis and rhabdomyositis in a patient with stage IV melanoma treated with combined ipilimumab and nivolumab*. Curr Oncol, 2019. **26**(3): p. e418-e421.
4. Yamaguchi, S., et al., *Late-Onset Fulminant Myocarditis With Immune Checkpoint Inhibitor Nivolumab*. Can J Cardiol, 2018. **34**(6): p. 812.e1-812.e3.
5. Geisler, B.P., et al., *Apical ballooning and cardiomyopathy in a melanoma patient treated with ipilimumab: a case of takotsubo-like syndrome*. J Immunother Cancer, 2015. **3**: p. 4.
6. Yun, S., et al., *Late onset ipilimumab-induced pericarditis and pericardial effusion: a rare but life threatening complication*. Case Rep Oncol Med, 2015. **2015**: p. 794842.
7. Laubli, H., et al., *Acute heart failure due to autoimmune myocarditis under pembrolizumab treatment for metastatic melanoma*. J Immunother Cancer, 2015. **3**: p. 11.
